# Supplementary material for: Insights into the thermal conductivity of MOF-5 from first principles
Source: Royal Society of Chemistry journal article supplement (doi:10.1039/d1ra07022c), 2021-01-01
Supplement: d1ra07022c1.pdf [file d1ra07022c1.pdf]

## Supplementary information:

### Insights into the thermal conductivity of MOF-5 from first principles

Shenglong Zhang<sup>ab</sup>, Jian Liu<sup>\*ab</sup> and Linhua Liu<sup>\*ab</sup>

The phonon lifetime  $\tau_\lambda$  is calculated based on a perturbation to the non-interacting harmonic modes  $\lambda = (q, s)$ . We focus our attention on the three-phonon processes whose scattering rate  $1/\tau_\lambda$  in the single-mode relaxation time approximation can be computed via

$$\frac{1}{\tau_\lambda} = \pi \sum_{q', s', q'', s''} |V_3(s, -q; s', q'; s'', q'')|^2 \\ \times \left[ (1 + n_{s'q'} + n_{s''q''}) \delta(\omega_{s'q'} + \omega_{s''q''} - \omega_{s,-q}) + 2(n_{s''q''} - n_{s'q'}) \delta(\omega_{s'q'} - \omega_{s''q''} - \omega_{s,-q}) \right]$$

where  $V_3(s, -q; s', q'; s'', q'')$  are the three-phonon coupling matrix elements.

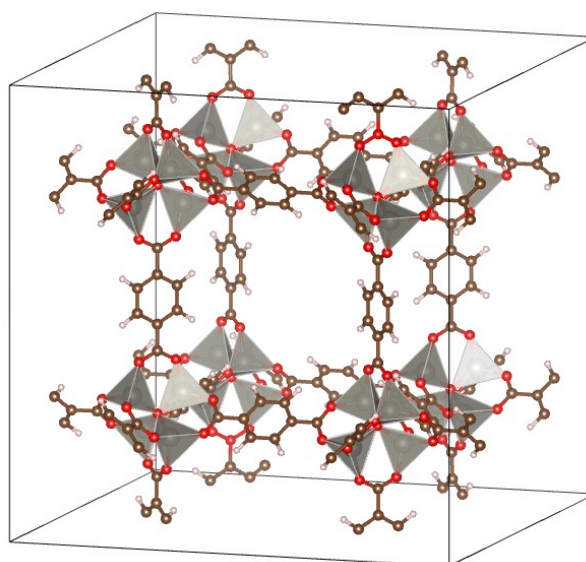

Fig. S1 The optimized crystal structure of MOF-5 in consist of organic linkers and ZnO<sub>4</sub> metal clusters.

<sup>a</sup> School of Energy and Power Engineering, Shandong University, Jinan, Shandong, 250061, China

<sup>b</sup> Optics and Thermal Radiation Research Center, Institute of Frontier and Interdisciplinary Science, Shandong University, Qingdao, Shandong, 266237, China

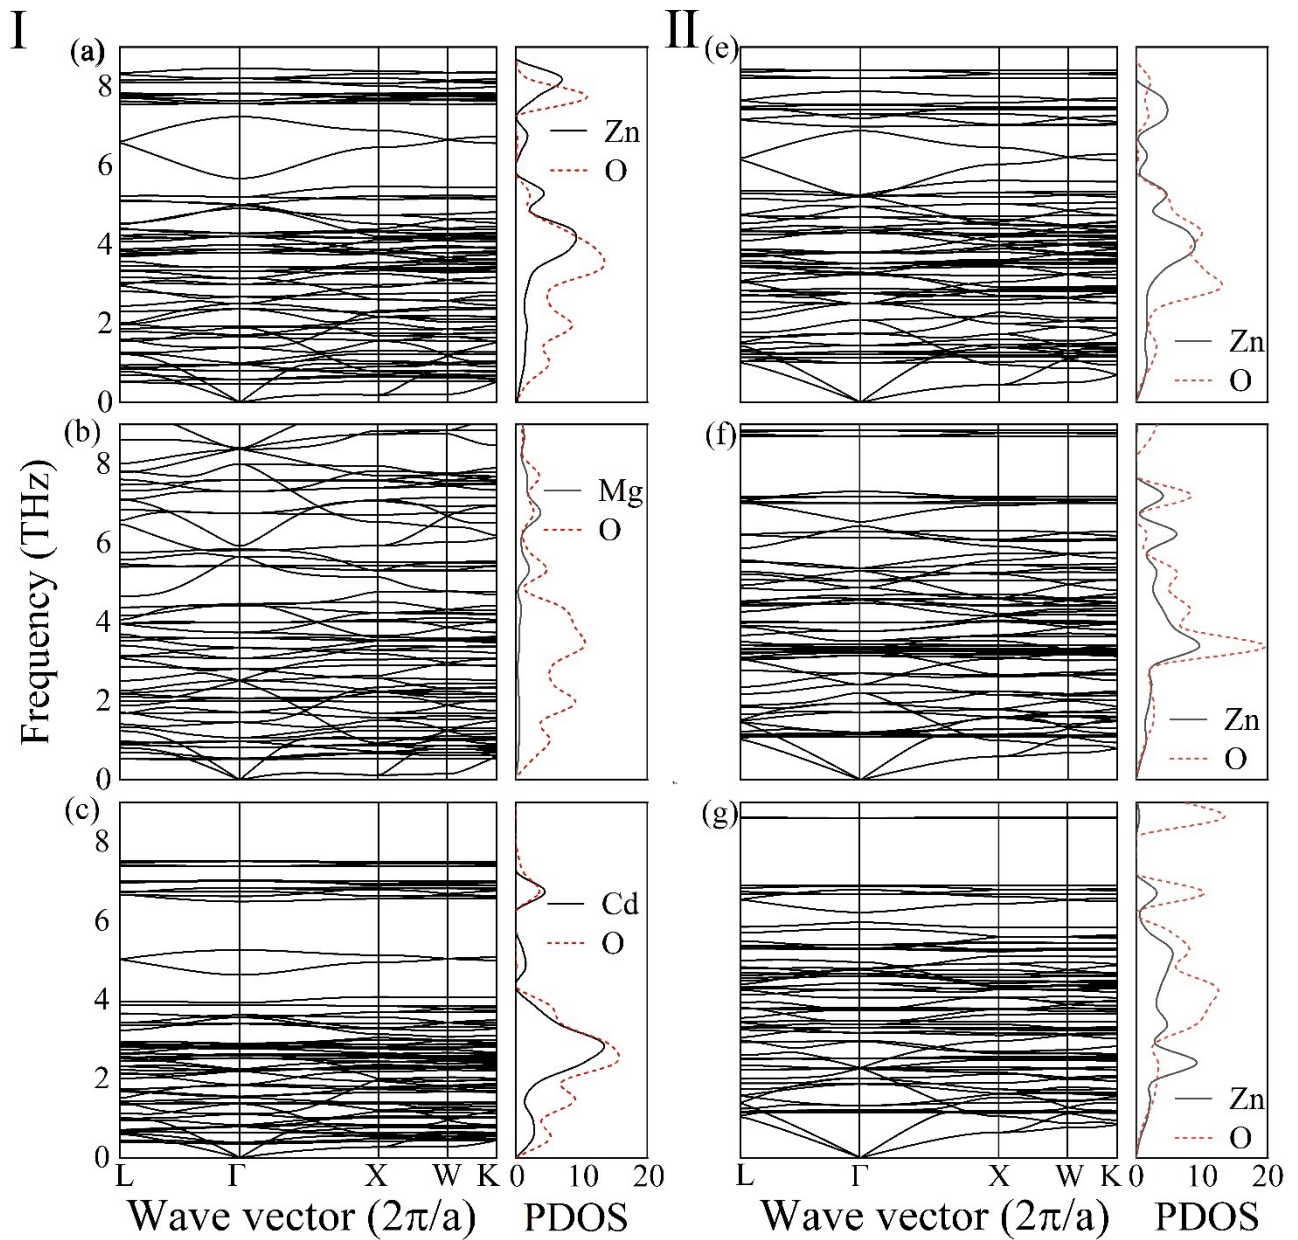

Fig. S2. (I). The phonon dispersion curves and phonon PDOS of MOF-5 with different metals (a) Zn, (b) Mg, and (c) Cd. (II). The phonon dispersion curves and phonon PDOS of MOF-5 under  $\epsilon$  of (e) 2%, (f) 4%, and (g) 6%. For clarity, only the low-frequency phonon bands are shown, since phonon dispersion curves above 8 THz are rather flat.
